# Supplementary material
Source: PubMed Central journal article supplement (PMC4528748)
Supplement: supp_pp.15.00433_PP2015-00433R3_Supplemental_Materialtbls.pdf [file supp_pp.15.00433_PP2015-00433R3_Supplemental_Materialtbls.pdf]

**Supplemental Table S1. Position of flower that showed senescence/abscission in the 35S:EDFs Arabidopsis.**

| Construct                                | <i>35S:EDF1</i><br>n=47 | <i>35S:EDF2</i><br>n=59 | <i>35S:EDF3</i><br>n=59 | <i>35S:EDF4</i><br>n=43 | WT<br>N=40     |
|------------------------------------------|-------------------------|-------------------------|-------------------------|-------------------------|----------------|
| Position of flower senescence/abscission | 3.35 $\pm$ 0.43         | 2.9 $\pm$ 0.5           | 3.2 $\pm$ 0.52          | 3.2 $\pm$ 0.58          | 5.1 $\pm$ 0.55 |
| Significance (TG/WT)                     | P $\leq$ 0.01           | P $\leq$ 0.01           | P $\leq$ 0.01           | P $\leq$ 0.01           | Not applicable |

Statistic analysis was measured by student's T-test.

**Supplemental Table S2. Position of flower that showed senescence/abscission in the 35S:EDFs+SRDX Arabidopsis.**

| Construct                                | <i>35S:EDF1</i><br>+ <i>SRDX</i> ,<br>n=52 | <i>35S:EDF2</i><br>+ <i>SRDX</i> ,<br>n=60 | <i>35S:EDF3</i><br>+ <i>SRDX</i> ,<br>n=68 | <i>35S:EDF4</i><br>+ <i>SRDX</i> ,<br>n=59 | WT<br>N=40     |
|------------------------------------------|--------------------------------------------|--------------------------------------------|--------------------------------------------|--------------------------------------------|----------------|
| Position of flower senescence/abscission | 2.97 $\pm$ 0.53                            | 2.52 $\pm$ 0.33                            | 2.65 $\pm$ 0.23                            | 2.62 $\pm$ 0.29                            | 5.1 $\pm$ 0.55 |
| Significance (TG/WT)                     | P $\leq$ 0.01                              | P $\leq$ 0.01                              | P $\leq$ 0.01                              | P $\leq$ 0.01                              | Not applicable |

Statistic analysis was measured by student's T-test.

**Supplemental Table S3. Position of flower that showed senescence/abscission in the 35S:EDFs+SRDX/*etr1-1* Arabidopsis.**

| Construct                                 | 35S:EDF1+<br>SRDX/ <i>etr1-1</i><br>n=15 | 35S:EDF2+<br>SRDX/ <i>etr1-1</i><br>n=13 | 35S:EDF3+<br>SRDX/ <i>etr1-1</i><br>n=17 | 35S:EDF4+<br>SRDX/ <i>etr1-1</i><br>n=16 | <i>etr1-1</i><br>n=10 |
|-------------------------------------------|------------------------------------------|------------------------------------------|------------------------------------------|------------------------------------------|-----------------------|
| Position of flower senescence /abscission | 4.2 <sub>±</sub> 0.6                     | 3.56 <sub>±</sub> 0.68                   | 4.4 <sub>±</sub> 0.54                    | 4.26 <sub>±</sub> 0.49                   | 9.5 <sub>±</sub> 1.02 |
| Significance (TG/ <i>etr1-1</i> )         | P <sub>≤</sub> 0.01                      | P <sub>≤</sub> 0.01                      | P <sub>≤</sub> 0.01                      | P <sub>≤</sub> 0.01                      | Not applicable        |

Statistic analysis was measured by student's T-test.

**Supplemental Table S4. Position of flower that showed senescence/abscission in the 35S:EDFs+SRDX/*ein2-1* Arabidopsis.**

| Construct                                 | 35S:EDF1+<br>SRDX/ <i>ein2-1</i><br>n=20 | 35S:EDF2+<br>SRDX/ <i>ein2-1</i><br>n=23 | 35S:EDF3+<br>SRDX/ <i>ein2-1</i><br>n=19 | 35S:EDF4+<br>SRDX/ <i>ein2-1</i><br>n=15 | <i>ein2-1</i><br>n=10 |
|-------------------------------------------|------------------------------------------|------------------------------------------|------------------------------------------|------------------------------------------|-----------------------|
| Position of flower senescence /abscission | 4.66 <sub>±</sub> 0.38                   | 3.98 <sub>±</sub> 0.78                   | 5 <sub>±</sub> 0.71                      | 4.86 <sub>±</sub> 0.55                   | 9.2 <sub>±</sub> 0.92 |
| Significance (TG/ <i>ein2-1</i> )         | P <sub>≤</sub> 0.01                      | P <sub>≤</sub> 0.01                      | P <sub>≤</sub> 0.01                      | P <sub>≤</sub> 0.01                      | Not applicable        |

Statistic analysis was measured by student's T-test.

**Supplemental Table S5. Arabidopsis genes up-regulated in the 35S:FYF+GR Arabidopsis.**

| Gene Name   | Description                                                          | PValueLogRatio | DEX treat after 3hr<br>(Normalized<br>Expression Ratio) |
|-------------|----------------------------------------------------------------------|----------------|---------------------------------------------------------|
| At5g42040.1 | Regulatory particle non-ATPase 12B (RPN12b)                          | 0.0000009814   | 2.21                                                    |
| At1g52810.1 | 2-oxoglutarate-dependent dioxygenase-related similar to AOP1.2       | 0.0421979770   | 2.03                                                    |
| At5g40000.1 | AAA-type ATPase family protein                                       | 0.0000006968   | 2.20                                                    |
| At2g13810.1 | AGD2-like defense response protein 1                                 | 0.0000503158   | 2.35                                                    |
| At1g34050.1 | Ankyrin repeat family protein contains ankyrin repeat domains        | 0.0000000001   | 3.16                                                    |
| At5g54710.1 | Ankyrin repeat family protein contains ankyrin repeat domains        | 0.0000070965   | 2.01                                                    |
| At4g11000.1 | Ankyrin repeat family protein contains ankyrin repeats               | 0.0000011824   | 2.16                                                    |
| At5g67340.1 | beta-catenin repeat family protein                                   | 0.0000023224   | 2.10                                                    |
| At5g58680.1 | beta-catenin repeat family protein                                   | 0.0000007333   | 2.20                                                    |
| At5g42410.1 | Small auxin upregulated RNA 43(SAUR43)                               | 0.0000003401   | 2.27                                                    |
| At2g14960.1 | Encodes a protein similar to IAA-amido synthases (GH3.1)             | 0.0000001051   | 2.37                                                    |
| At1g27740.1 | Basic helix-loop-helix (bHLH) family protein                         | 0.0000035137   | 2.36                                                    |
| At5g56960.1 | Basic helix-loop-helix (bHLH) family protein                         | 0.0000020631   | 2.12                                                    |
| At5g43650.1 | Basic helix-loop-helix (bHLH) family protein(bHLH92)                 | 0.0000000003   | 2.99                                                    |
| At2g45760.1 | BON1-associated protein (BAP1)                                       | 0.0000002139   | 2.30                                                    |
| At5g57010.1 | Calmodulin-binding family protein                                    | 0.0000000244   | 2.50                                                    |
| At5g26920.1 | Calmodulin-binding protein 60(CBP60)                                 | 0.0000031942   | 2.07                                                    |
| At1g27890.1 | Polynucleotidyl transferase, ribonuclease H-like superfamily protein | 0.0000034766   | 2.07                                                    |
| At1g61470.1 | Polynucleotidyl transferase, ribonuclease H-like superfamily protein | 0.0000013653   | 2.14                                                    |
| At1g27820.1 | Polynucleotidyl transferase, ribonuclease H-like superfamily protein | 0.0000065319   | 2.02                                                    |
| At1g63245.1 | CLAVATA3/ESR-Related 14 (CLE14)                                      | 0.0005067724   | 2.21                                                    |
| At1g08860.1 | Copine-like protein                                                  | 0.0000037113   | 2.06                                                    |
| At3g48320.1 | Cytochrome P450 71A21                                                | 0.0026060140   | 2.04                                                    |
| At2g45550.1 | Cytochrome P450 family protein                                       | 0.0000618807   | 3.23                                                    |
| At4g31950.1 | Cytochrome P450 family protein cytochrome P450 monooxygenase         | 0.0000000030   | 2.72                                                    |
| At1g74110.1 | Cytochrome P450 family protein similar to Cytochrome P450 78A4       | 0.0006640643   | 2.25                                                    |
| At4g31970.1 | Cytochrome P450 family protein similar to cytochrome P450 82C1       | 0.0000000802   | 2.40                                                    |
| At1g12740.1 | Cytochrome P450 family protein similar to Cytochrome P450 90A1       | 0.0000008164   | 2.19                                                    |
| At2g21910.1 | Cytochrome P450 family protein similar to Cytochrome P450 96A5       | 0.0000000284   | 2.51                                                    |
| At1g52900.1 | Toll-Interleukin-Resistance (TIR) domain family protein              | 0.0000633215   | 2.11                                                    |
| At1g66090.1 | Disease resistance protein (TIR-NBS class)                           | 0.0000067894   | 2.01                                                    |
| At3g15960.1 | DNA mismatch repair MutS family protein                              | 0.0001509814   | 2.00                                                    |
| At4g26740.1 | Embryo-specific protein 1 (ATS1)                                     | 0.0027421999   | 3.27                                                    |
| At3g23220.1 | Ethylene-responsive element-binding protein(ERF95)                   | 0.0000089198   | 2.81                                                    |
| At1g22810.1 | DREB subfamily A-5 of ERF/AP2 transcription factor family(ERF19)     | 0.0000038062   | 2.06                                                    |
| At1g71450.1 | DREB subfamily A-4 of ERF/AP2 transcription factor family(ERF21).    | 0.0004296007   | 2.25                                                    |
| At5g43410.1 | Ethylene-responsive factor(ERF96)                                    | 0.0002813103   | 2.13                                                    |
| At3g23230.1 | Ethylene-responsive factor98(ERF98)                                  | 0.0000009642   | 2.18                                                    |
| At3g09520.1 | Exocyst subunit EXO70 family protein H4                              | 0.0000000784   | 2.41                                                    |
| At4g01360.1 | Encodes a protein related to BYPASS1 (BPS3)                          | 0.0000018524   | 2.12                                                    |

|             |                                                                          |              |      |
|-------------|--------------------------------------------------------------------------|--------------|------|
| At5g03210.1 | DBP interactin protein 2 (DIP2)                                          | 0.0000007187 | 2.20 |
| At1g05880.1 | Arabidopsis Ariadne 12 (ARI12)                                           | 0.0000000137 | 2.60 |
| At1g13310.1 | Endosomal targeting BRO1-like domain-containing protein                  | 0.0000000018 | 2.80 |
| At1g26390.1 | FAD-binding domain-containing protein                                    | 0.0246118415 | 3.01 |
| At1g30700.1 | FAD-binding Berberine family protein                                     | 0.0000000004 | 2.94 |
| At1g30720.1 | FAD-binding Berberine family protein                                     | 0.0000000223 | 2.53 |
| At2g39490.1 | F-box family protein                                                     | 0.0061853351 | 2.52 |
| At2g02310.1 | Phloem protein 2-B6 (PP2-B6)                                             | 0.0000000022 | 3.35 |
| At2g02320.1 | Phloem protein 2-B7 (PP2-B7);                                            | 0.0046575867 | 3.59 |
| At1g14185.1 | Glucose-methanol-choline (GMC) oxidoreductase family protein             | 0.0000148416 | 2.06 |
| At5g11210.1 | Glutamate receptor family protein (GLR2.5)                               | 0.0000000026 | 2.89 |
| At3g60120.1 | Beta glucosidase 27 (BGLU27)                                             | 0.0000000484 | 2.56 |
| At5g24540.1 | Beta glucosidase 31 (BGLU31);                                            | 0.0000063019 | 2.03 |
| At1g66280.1 | Beta-glucosidase 22 (BGLU22)                                             | 0.0218837634 | 3.58 |
| At5g63230.1 | Glycosyl hydrolase family protein 17                                     | 0.0326333175 | 3.31 |
| At5g59070.1 | UDP-Glycosyltransferase superfamily protein                              | 0.0000044476 | 2.05 |
| At1g55780.1 | Heavy-metal-associated domain-containing protein                         | 0.0000000041 | 8.97 |
| At5g46010.1 | Homeodomain-like superfamily protein                                     | 0.0278535974 | 3.57 |
| At1g69240.1 | Hydrolase, alpha/beta fold family protein                                | 0.0007482860 | 2.03 |
| At1g74710.1 | Isochorismate synthase 1 (ICS1)                                          | 0.0000008522 | 2.19 |
| At1g35513.1 | Isochorismate synthase-related / isochirismate mutase-related            | 0.0000008362 | 2.37 |
| At4g39580.1 | Galactose oxidase/kelch repeat superfamily protein                       | 0.0000024551 | 2.12 |
| At1g70130.1 | Concanavalin A-like lectin protein kinase family protein                 | 0.0000035963 | 2.07 |
| At5g01560.1 | Lectin protein kinase A4.3                                               | 0.0000010621 | 2.17 |
| At1g66780.1 | MATE efflux family protein                                               | 0.0000001601 | 2.41 |
| At4g21840.1 | Methionine sulfoxide reductase domain-containing protein                 | 0.0000162807 | 2.03 |
| At1g01560.1 | MAPkinase 11( MPK11)                                                     | 0.0000045875 | 2.04 |
| At5g22380.1 | NAC domain containing protein 90 (NAC090)                                | 0.0000000000 | 3.31 |
| At2g17040.1 | NAC domain contain protein 36 (NAC036)                                   | 0.0000026773 | 2.09 |
| At3g44350.1 | NAC domain containing protein 61 (NAC061)                                | 0.0000000010 | 2.94 |
| At5g63130.1 | Octicosapeptide/Phox/Bem1p (PB1) domain-containing protein               | 0.0000052365 | 2.03 |
| At1g77530.1 | O-methyltransferase family 2 protein                                     | 0.0000114345 | 2.07 |
| At2g36690.1 | Oxidoreductase, 2OG-Fe(II) oxygenase family protein                      | 0.0000000200 | 4.44 |
| At1g09935.1 | Phosphoglycerate/bisphosphoglycerate mutase family protein               | 0.0000000000 | 4.87 |
| At1g09932.1 | Phosphoglycerate/bisphosphoglycerate mutase family protein               | 0.0000005024 | 2.23 |
| At1g75830.1 | Pathogenesis-related protein, belongs to the plant defensin (PDF) family | 0.0378577718 | 2.05 |
| At3g07195.1 | RPM1-interacting protein 4 (RIN4) family protein                         | 0.0000012513 | 2.16 |
| At4g00970.1 | Cysteine-rich receptor-like protein kinase 41                            | 0.0000037483 | 2.06 |
| At4g11470.1 | Cysteine-rich receptor-like protein kinase 31                            | 0.0000000005 | 2.98 |
| At5g47850.1 | CRINKLY4 related 4 (CCR4)                                                | 0.0000000132 | 2.58 |

|             |                                                                  |              |      |
|-------------|------------------------------------------------------------------|--------------|------|
| At1g07160.1 | Protein phosphatase 2C family protein                            | 0.0000019776 | 2.11 |
| At5g43090.1 | Pumilio proteins13 (PUM13) containing PUF domain                 | 0.0002190484 | 3.51 |
| At2g35770.1 | Serine carboxypeptidase-like 28 (scpl28)                         | 0.0013965508 | 2.34 |
| At3g51680.1 | Short-chain dehydrogenase/reductase (SDR) family protein         | 0.0000000312 | 2.91 |
| At5g65165.1 | Succinate dehydrogenase(SDH2-3)                                  | 0.0007416950 | 2.49 |
| At1g16230.1 | Target SNARE coiled-coil domain protein                          | 0.0000683101 | 2.24 |
| At5g48110.1 | Terpene synthase/cyclase family protein                          | 0.0000000122 | 2.61 |
| At1g24420.1 | HXXXD-type acyl-transferase family protein                       | 0.0001136897 | 3.60 |
| At1g01680.1 | U-box domain-containing protein 54                               | 0.0000000000 | 3.50 |
| At3g61390.1 | RING/U-box superfamily protein                                   | 0.0165444593 | 3.66 |
| At2g23260.1 | UDP-glucuronosyl/UDP-glucosyl transferase family protein         | 0.0000001124 | 2.45 |
| At1g79680.1 | Wall-associated kinase like 10                                   | 0.0000000441 | 2.49 |
| At5g24110.1 | WRKY family transcription factor 30                              | 0.0000001021 | 2.37 |
| At2g21900.1 | WRKY family transcription factor 59                              | 0.0227754116 | 2.40 |
| At4g11070.1 | WRKY family transcription factor 41                              | 0.0000001114 | 2.39 |
| At1g66550.1 | WRKY family transcription factor 67                              | 0.0001661204 | 4.09 |
| At2g15390.1 | Xyloglucan fucosyltransferase 4 (FUT4)                           | 0.0000035152 | 2.09 |
| At1g27730.1 | Salt tolerance zinc finger (C2H2 type) family protein 10 (ZAT10) | 0.0000054237 | 2.03 |
| At3g46090.1 | Salt tolerance zinc finger (C2H2 type) family protein 7 (ZAT7)   | 0.0000074257 | 2.00 |
| At3g53600.1 | Zinc finger (C2H2 type) family protein                           | 0.0000029968 | 2.08 |
| At4g09100.1 | Zinc finger (C3HC4-type RING finger) family protein              | 0.0000000247 | 2.51 |
| At1g43000.1 | Zinc-binding family protein                                      | 0.0000000030 | 2.72 |
| At3g46080.1 | Zinc finger (C2H2 type) family protein                           | 0.0000006011 | 2.21 |
| At5g67450.1 | Arabidopsis zinc finger (C2H2 type) protein 1 (AZF1)             | 0.0000021462 | 2.14 |
| At2g42360.1 | Zinc finger (C3HC4-type RING finger) family protein              | 0.0000019322 | 2.11 |
| At1g53820.1 | Zinc finger (C3HC4-type RING finger) family protein              | 0.0000000025 | 4.66 |
| At2g46495.1 | Zinc finger (C3HC4-type RING finger) family protein              | 0.0000006452 | 2.28 |

---

**Supplemental Table S6. Arabidopsis genes down-regulated in the 35S:FYF+GR Arabidopsis.**

| Gene Name   | Description                                         | PValueLogRatio | DEX treat after 3hr<br>(Normalized<br>Expression Ratio) |
|-------------|-----------------------------------------------------|----------------|---------------------------------------------------------|
| At2g04038.1 | Basic leucine-zipper 48 (bZIP48)                    | 0.0000000407   | 0.13                                                    |
| At1g48110.1 | Evolutionarily conserved C-terminal region 7        | 0.0000000012   | 0.19                                                    |
| At4g19800.1 | Glycosyl hydrolase family 18 protein                | 0.0002092207   | 0.14                                                    |
| At4g35170.1 | Late embryogenesis family protein                   | 0.0056002494   | 0.34                                                    |
| At5g65080.1 | MADS-box family protein, agamous like 68(AGL68)     | 0.0160600295   | 0.27                                                    |
| At1g35515.1 | Myb family transcription factor 8 (MYB8)            | 0.0000000003   | 0.05                                                    |
| At3g16360.1 | phosphotransfer family protein (AHP4)               | 0.0050701954   | 0.45                                                    |
| At3g17910.1 | Embryo deffective 3121                              | 0.0000000000   | 0.07                                                    |
| At4g20370.1 | Twin sister of FT protein (TSF) / TFL1 like protein | 0.0329164375   | 0.50                                                    |
| At5g10970.1 | zinc finger (C2H2 type) family protein              | 0.0007139490   | 0.50                                                    |

**Supplemental Table S7.** Oligo nucleotide sequence of primers used in gene cloning and PCR analysis.

| Gene name                        | Primer name   | Primer sequence                                                | Restriction site | Use              |
|----------------------------------|---------------|----------------------------------------------------------------|------------------|------------------|
| <i>EDF1</i><br><i>At1g25560</i>  | EDF1-F-2      | 5'- <u>TCTAGAG</u> CAACAAAACTTAACCCATTCTCTCTCT-3'              | XbaI             | cDNA cloning     |
|                                  | EDF1-R-nos-2  | 5'- <u>GGTACCC</u> AAGATGTTGATAATCGCCTGCTTC-3'                 | KpnI             | cDNA cloning     |
|                                  | EDF1-R-stop-2 | 5'- <u>GGTACCT</u> CACAAGATGTTGATAATCGCCTGCTTC-3'              | KpnI             | cDNA cloning     |
|                                  | EDF1-P-F1     | 5'- <u>CTGCAGG</u> TGGAAAAATTAGGTACTCTGCTCCG-3'                | PstI             | Promoter cloning |
|                                  | EDF1-P-R1     | 5'- <u>GGATCC</u> ATTGTTGTGTTTGTGAGAGAGAAACAAAAAAGAAG-3'       | BamHI            | Promoter cloning |
|                                  | RT-EDF1-1     | 5'-TCACAAACACAACAAATATGGAATACAG-3'                             |                  | Real time PCR    |
|                                  | RT-EDF1-2     | 5'-GCTTTGGAGTAGTAGAGATGGAGAG-3'                                |                  | Real time PCR    |
| <i>EDF2</i><br><i>At1g68840</i>  | EDF2-F-2      | 5'- <u>TCTAGACA</u> ACGTCACCTAAATCTCTCTCACC-3'                 | XbaI             | cDNA cloning     |
|                                  | EDF2-R-nos-2  | 5'- <u>GGTACCC</u> AAAGCATTGATTATCGCCTGCTTC-3'                 | KpnI             | cDNA cloning     |
|                                  | EDF2-R-stop-2 | 5'- <u>GGTACCT</u> CACAAAAGCATTGATTATCGCCTGCTTC-3'             | KpnI             | cDNA cloning     |
|                                  | EDF2-P-F1     | 5'- <u>CTGCAGC</u> CTCAAAGATAGTATTATACGTGTCTACG-3'             | PstI             | Promoter cloning |
|                                  | EDF2-P-R1     | 5'-GGATCCTTTCTTTGTTTCAGTTTCTTGAAGATTCTCACC-3'                  | BamHI            | Promoter cloning |
|                                  | RT-EDF2-1     | 5'-CTAAACAACACGCCGAGAAACAC-3'                                  |                  | Real time PCR    |
|                                  | RT-EDF2-2     | 5'-GCCGAACCACCACCTGAACC-3'                                     |                  | Real time PCR    |
| <i>EDF3</i><br><i>At3g25730</i>  | EDF3-F-2      | 5'- <u>GGATCCC</u> CACATATACATTCACATTACTAATCTCTCAAGATTTC-3'    | BamHI            | cDNA cloning     |
|                                  | EDF3-R-nos-2  | 5'- <u>GGTACCC</u> AAAACTCGTTGCTTCTTACACCTTAAC-3'              | KpnI             | cDNA cloning     |
|                                  | EDF3-R-stop-2 | 5'- <u>GGTACCT</u> TACAAAACTCGTTGCTTCTTACACCTTAAC-3'           | KpnI             | cDNA cloning     |
|                                  | EDF3-P-F1     | 5'- <u>CTGCAGG</u> TACTGTTGAGTGTGACATATGATC-3'                 | PstI             | Promoter cloning |
|                                  | EDF3-P-R1     | 5'- <u>GGATCCG</u> TATGAAACGAAATAAGAACTGAGAGAAAATCAC-3'        | BamHI            | Promoter cloning |
|                                  | RT-EDF3-1     | 5'-ACACATATACATTCACATTACTAATCTC-3'                             |                  | Real time PCR    |
|                                  | RT-EDF3-2     | 5'-AATGGAATCTGTAGTTGTAGAGC-3'                                  |                  | Real time PCR    |
| <i>EDF4</i><br><i>At1g13260</i>  | EDF4-F-2      | 5'- <u>TCTAGACA</u> CTTGTGTTTCTTATTTCCCTCCC-3'                 | XbaI             | cDNA cloning     |
|                                  | EDF4-R-nos-2  | 5'- <u>GGTACCC</u> GAGCGTGAAAGATGCGTTG-3'                      | KpnI             | cDNA cloning     |
|                                  | EDF4-R-stop-2 | 5'- <u>GGTACCT</u> TACGAGGCGTGAAAGATGCGTTG-3'                  | KpnI             | cDNA cloning     |
|                                  | EDF4-P-F1     | 5'- <u>CTGCAGC</u> CATCTATTTCTTTTGTGCGATACCCAC-3'              | PstI             | Promoter cloning |
|                                  | EDF4-P-R1     | 5'- <u>GGATCC</u> TAATCTGTGTTTTTTTTTATGGTTTGAACAATGGAGAAAAC-3' | BamHI            | Promoter cloning |
|                                  | RT-EDF4-1     | 5'-CCGAAACATCACGCAGAGAAAAC-3'                                  |                  | Real time PCR    |
|                                  | RT-EDF4-2     | 5'-AACCCGACCCGCATCTAAATC-3'                                    |                  | Real time PCR    |
| <i>FUF1</i><br><i>At1g71450</i>  | FUF-F-3       | 5'- <u>TCTAGA</u> ACAACAACAACTCTTGAGCAAAAACT-3'                | XbaI             | cDNA cloning     |
|                                  | FUF-R-4       | 5'- <u>GGTACCC</u> CTTGTGGTAGACTATGAAAA-3'                     | KpnI             | cDNA cloning     |
|                                  | FUF-P-F1      | 5'- <u>CTGCAGC</u> GGACGAAAAGGAGTGTACT-3'                      | PstI             | Promoter cloning |
|                                  | FUF-P-R2      | 5'- <u>GGATCC</u> GAACACACACACACACGCA-3'                       | BamHI            | Promoter cloning |
|                                  | RT-FUF-1      | 5'-CAGCATTTCGCATGGCAGTTC-3'                                    |                  | Real time PCR    |
|                                  | RT-FUF-2      | 5'-GACTCTGTTCTTCGGTGGTG-3'                                     |                  | Real time PCR    |
| <i>UBQ10</i><br><i>At4G05320</i> | RT-UBQ10-F    | 5'-CTCAGGCTCCGTGGTGGTATG-3'                                    |                  | Real time PCR    |
|                                  | RT-UBQ10-4-2  | 5'-GTGATAGTTTTCCAGTCAACGTC-3'                                  |                  | Real time PCR    |
| <i>BOP1</i>                      | RT-BOP1-1     | 5'-CGAAGAAGGAAACAATAACAGTAACGATAA-3'                           |                  | Real time PCR    |

|                                |                     |                                                      |       |               |
|--------------------------------|---------------------|------------------------------------------------------|-------|---------------|
| <i>At3G57130</i>               | RT-BOP1-2           | 5'-GTCATCTCCAATATCACGATTTGTAGCA-3'                   |       | Real time PCR |
| <i>BOP2</i>                    | RT-BOP2-1           | 5'-GCAACAACCAAAAACAATGATAACAATACC-3'                 |       | Real time PCR |
| <i>At2G41370</i>               | RT-BOP2-2           | 5'-CTGGACCCATCTGACCCGTACCT-3'                        |       | Real time PCR |
| <i>IDA</i>                     | IDA-F1              | 5'- <u>TCTAGA</u> AATGGCTCCGTGTCGTAC-3'              | xbaI  | cDNA cloning  |
| <i>At1G68765</i>               | IDA-R1              | 5'- <u>GGTACC</u> TCAATGAGGAAGAGAGTTAACAAAAGAGTTG-3' | KpnI  | cDNA cloning  |
|                                | RT-IDA-1            | 5'-CATTCAATTTACTCAAAGAAGTGGAAGTG-3'                  |       | Real time PCR |
|                                | RT-IDA-2            | 5'-GTGTCTCTTAGAAGGAGCAGAAGG-3'                       |       | Real time PCR |
| <i>HAESA</i>                   | RT-HAESA-1          | 5'-TGATTCAGAACTTGGAGATAAAGATATGG-3'                  |       | Real time PCR |
| <i>At4G28490</i>               | RT-HAESA-2          | 5'-CTTCCGTGTAGTAAGGCGAGAG-3'                         |       | Real time PCR |
| <i>HSL2</i>                    | RT-HSL2-1           | 5'-TACATTCTCCCAATCTCAATCCTCTG-3'                     |       | Real time PCR |
| <i>At5G65710</i>               | RT-HSL2-2           | 5'-CTGTTAATTGCGGGTATAATGTCTTCC-3'                    |       | Real time PCR |
| <i>HWS</i>                     | RT-HWS-1            | 5'-GATATACTCAACGGGAGGCTCAG-3'                        |       | Real time PCR |
| <i>At3G61590</i>               | RT-HWS-2            | 5'-CAGGTAAAGAACACGGCATTGG-3'                         |       | Real time PCR |
| <i>FYF</i>                     | AGL42-1             | 5'- <u>GGATCC</u> ATTCTAGGGCTCCTGACAGA-3'            | BamHI | cDNA cloning  |
| <i>At5g62165</i>               | AGL42-2             | 5'- <u>GGGATC</u> CTCGCAGTTTCTATTTGGC-3              | BamHI | cDNA cloning  |
|                                | RT-AGL42-1          | 5'-AGCAATCACGACTCACAAATTCAC-3'                       |       | Real time PCR |
|                                | RT-AGL42-2          | 5'-AGCCTTTCTTTCTCGACCTTTC-3'                         |       | Real time PCR |
| <i>SAG12</i>                   | RT-SAG12-1          | 5'-TCCAATTCTATTCGTCTGGTGTGT-3                        |       | Real time PCR |
| <i>At5G45890</i>               | RT-SAG12-2          | 5'-CCACTTTCTCCCCATTTGTTC-3                           |       | Real time PCR |
| <i><math>\alpha</math>-VPE</i> | RT- $\alpha$ -VPE-1 | 5'-GAGAACCGCTTGTGACGATTG -3                          |       | Real time PCR |
| <i>At2G25940</i>               | RT- $\alpha$ -VPE-2 | 5'-TTGCTGCCTCCTCCATTGC-3                             |       | Real time PCR |
| <i><math>\beta</math>-VPE</i>  | RT- $\beta$ -VPE-1  | 5'-AATTAAGTGAACAACAAGGCATAGG-3                       |       | Real time PCR |
| <i>At1G62710</i>               | RT- $\beta$ -VPE-2  | 5'-CATTCCCAATCGTCAACCAAAGG-3                         |       | Real time PCR |
| <i>AtMC1</i>                   | RT-MC1-1            | 5'-GGTGGTAGTGGTGGAGTTGTG-3                           |       | Real time PCR |
| <i>At1G02170</i>               | RT-MC1-2            | 5'-TGGCAAGCAGTCAGTTGAGG-3                            |       | Real time PCR |
| <i>AtMC9</i>                   | RT-MC9-1            | 5'-CATGATCTCTGATTCTTGCCATAGTG-3                      |       | Real time PCR |
| <i>At5G04200</i>               | RT-MC9-2            | 5'-TTATAGTCTTGTTTCGTGCTCAATAGC-3                     |       | Real time PCR |
